# Supplementary material
Source: PubMed Central journal article supplement (PMC7710556)
Supplement: NIHMS1621633-supplement-1.pdf [file NIHMS1621633-supplement-1.pdf]

## Input DNA mass

500 ng

50 ng

10 ng

Test LCM FFPE  
Sample 1

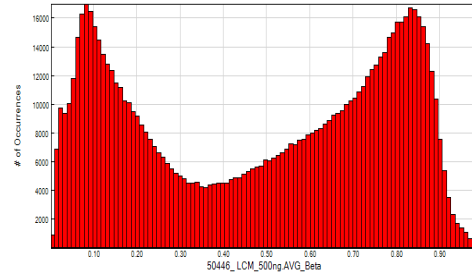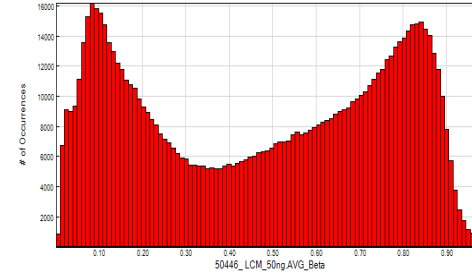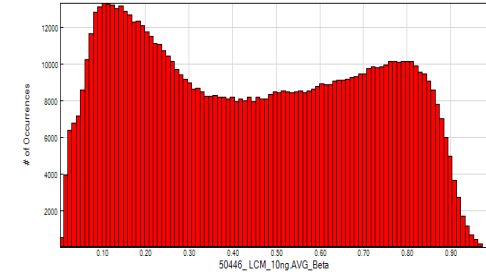

Test LCM FFPE  
Sample 2

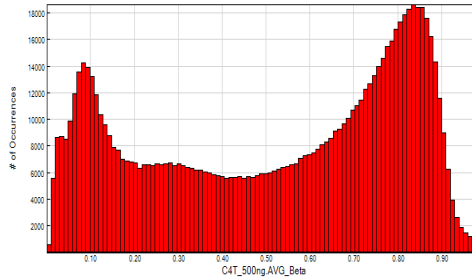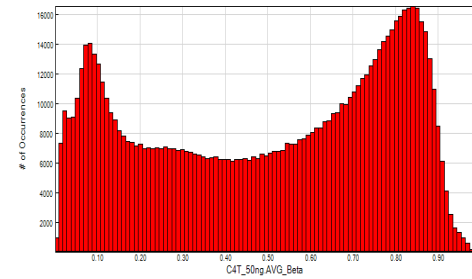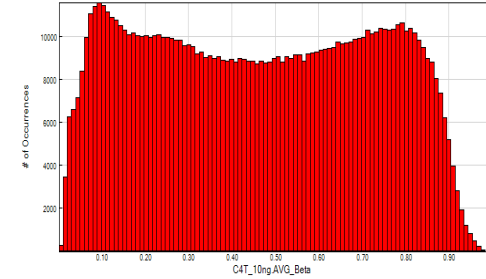

**Supplementary Figure S1.** Illumina MethylationEPIC  $\beta$ -value distributions of test LCM FFPE specimens as a function of input DNA mass.

# Cluster Dendrogram

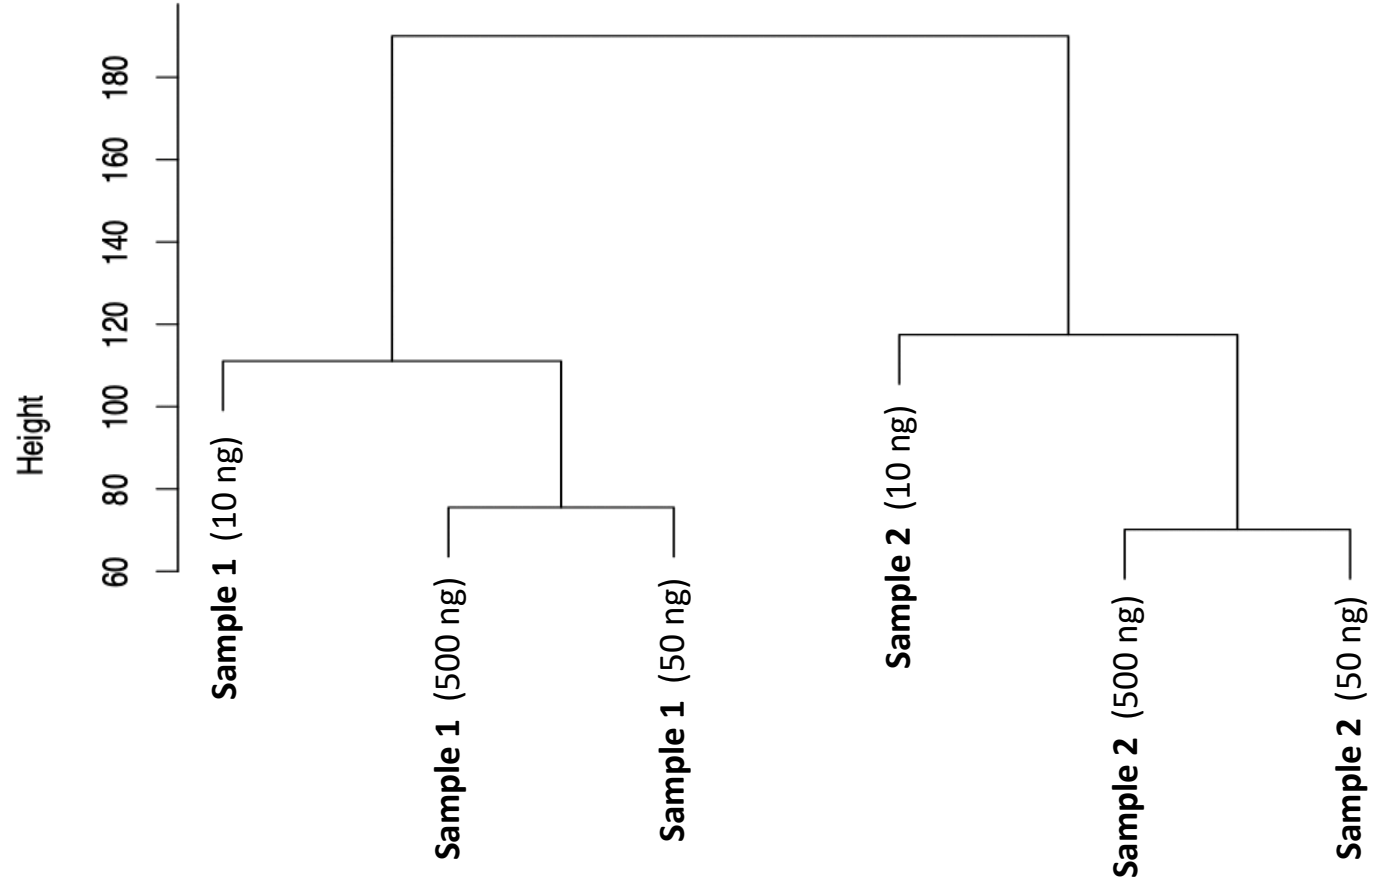

**Supplementary Figure S2.** Sample dendrogram of the test LCM FFPE specimens indicating methylation data variance with respect to input DNA mass.

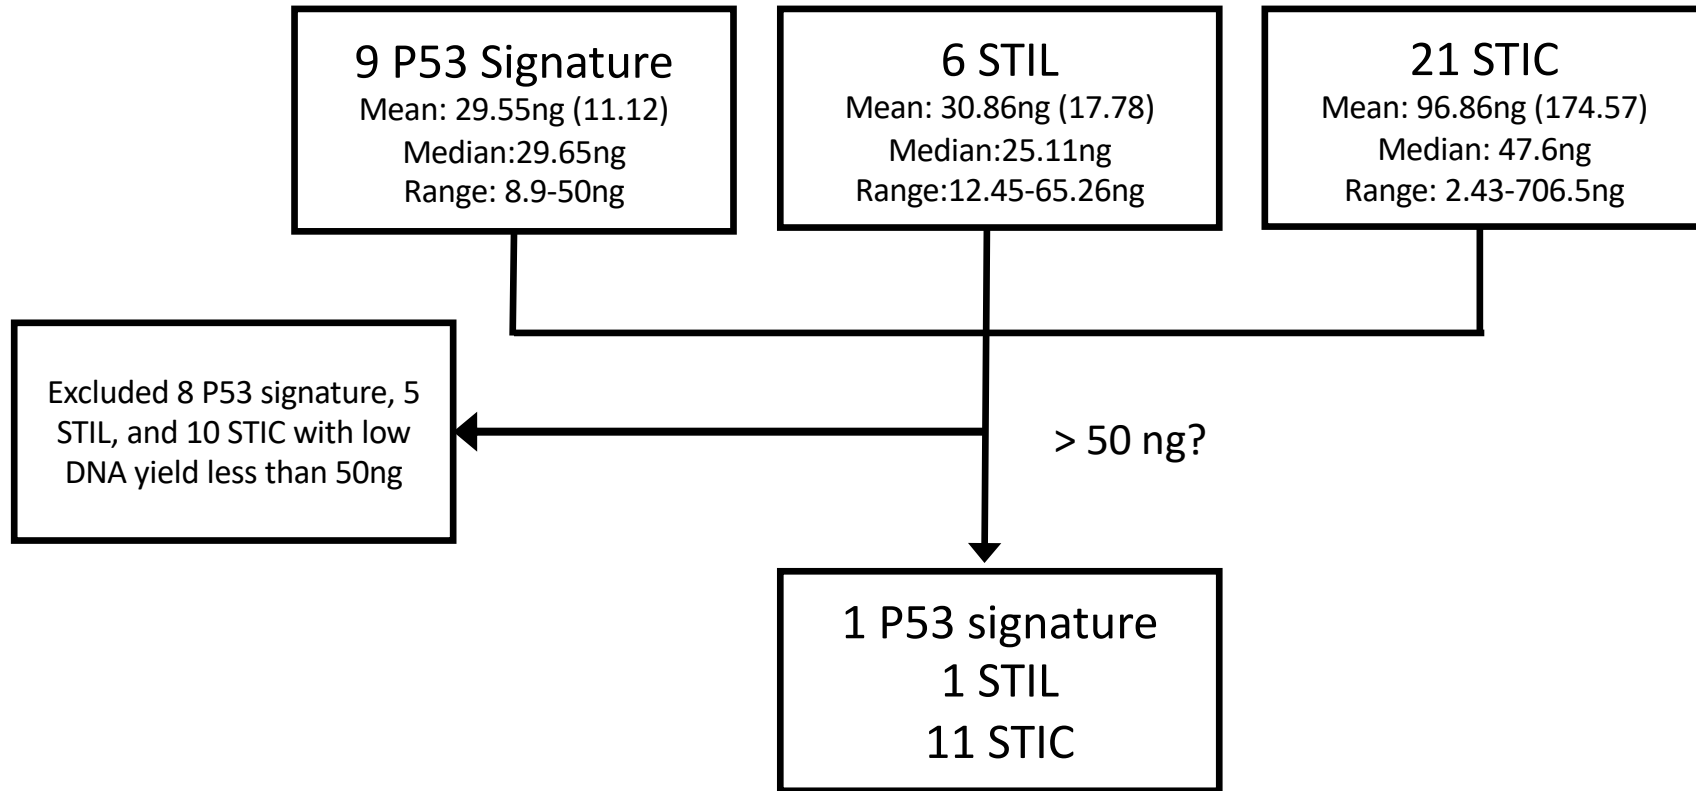

**Supplementary Figure S3.** Schema outlining sample selection for MethylationEPIC analysis.



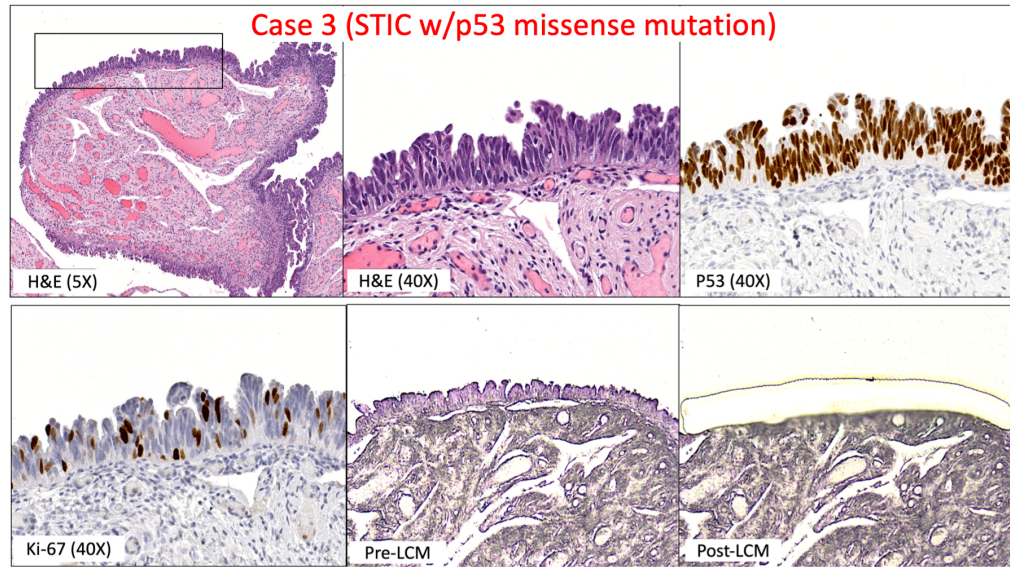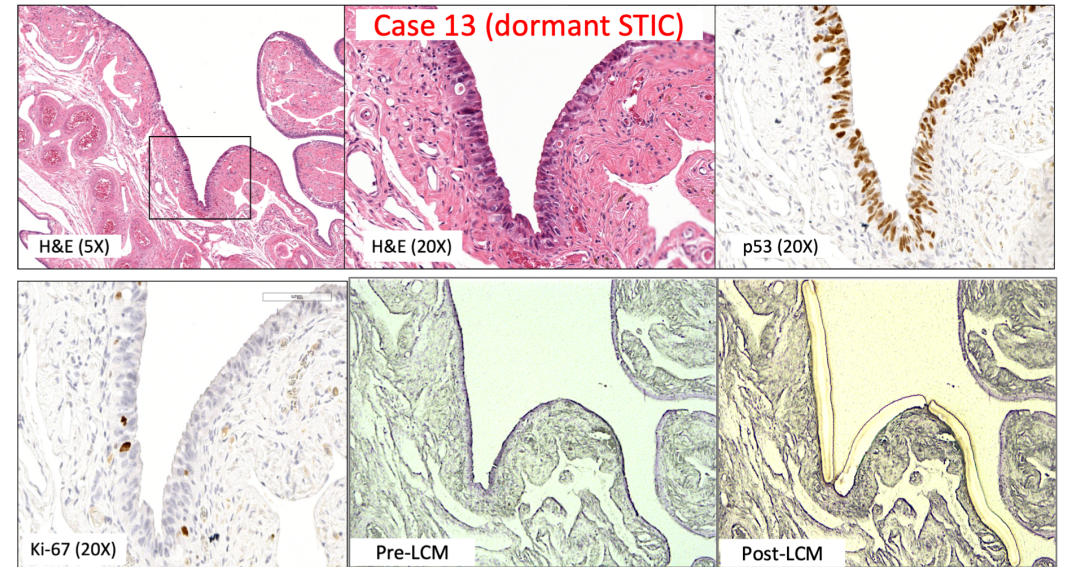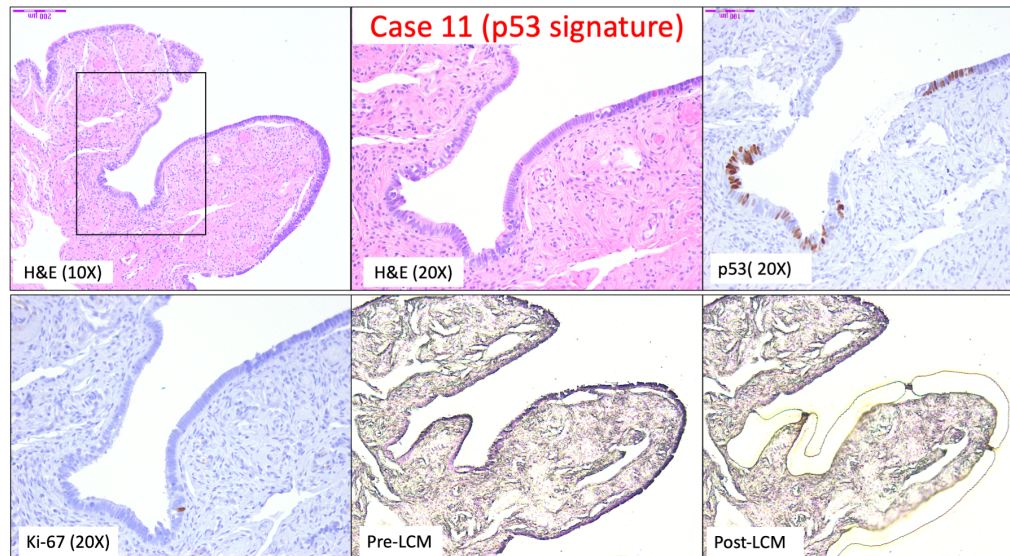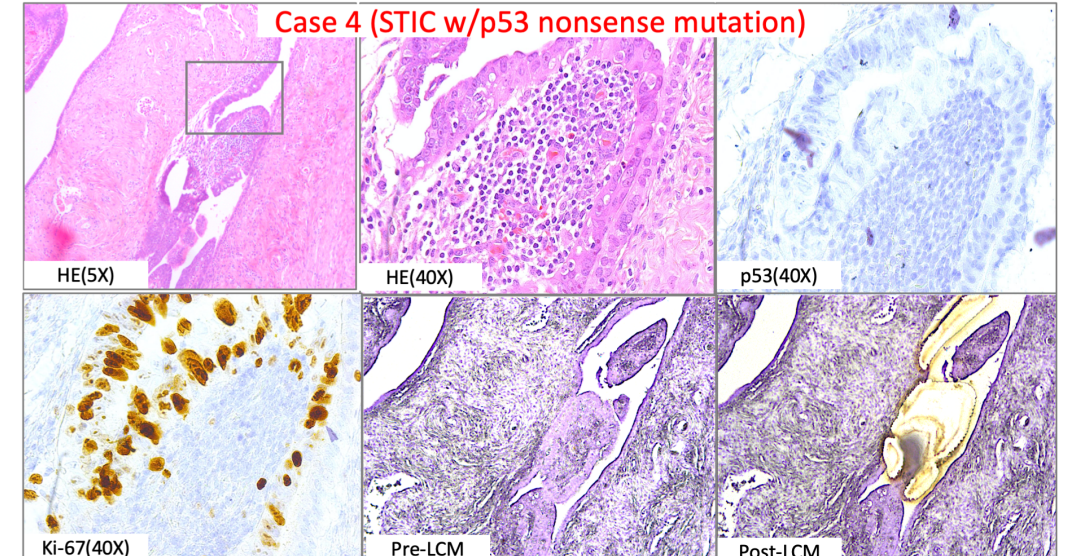

**Supplementary Figure S4.** Tissue sections of hematoxylin and eosin (H&E) staining, immunostaining of p53 and Ki-67 together with pre-LCM and post-LCM sections in four representative cases. STIC: serous tubal intraepithelial carcinoma.



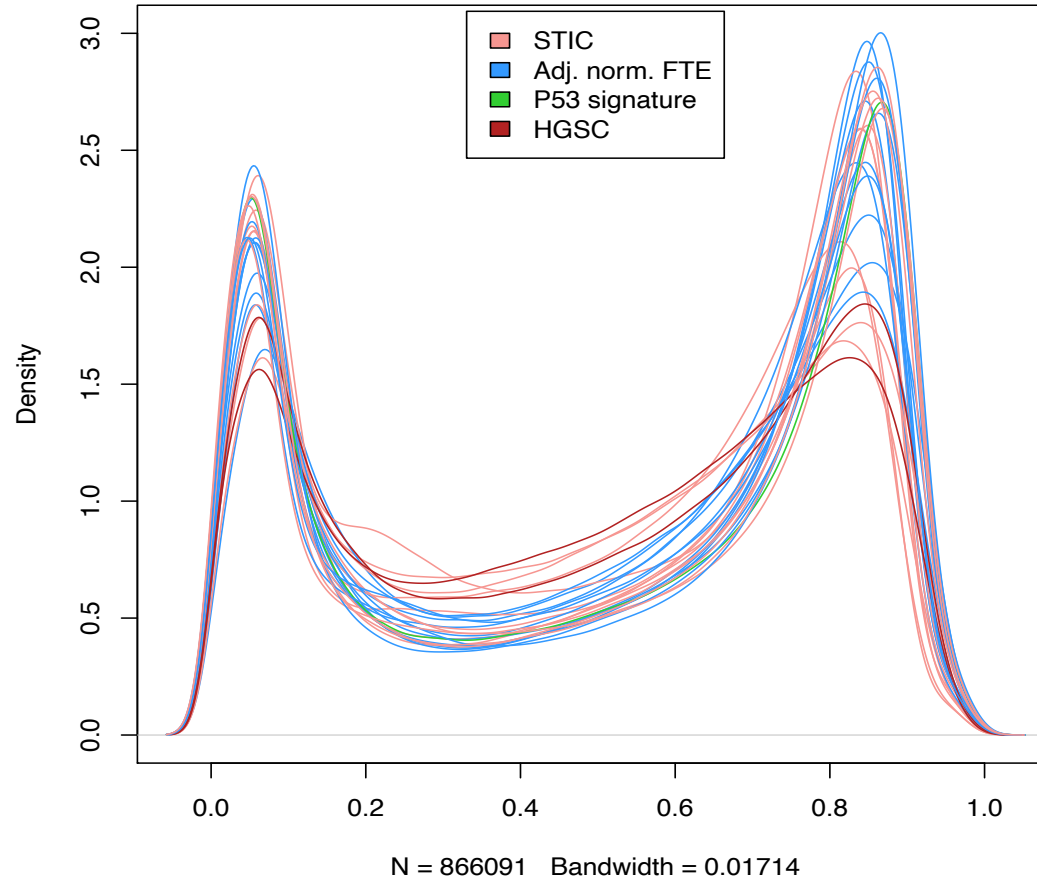

**Supplementary Figure S5.** QC plot showing Illumina MethylationEPIC  $\beta$ -value distributions of samples included in the study.
